# Supplementary material for: Novel pH sensing semiconductor for point-of-care detection of HIV-1 viremia
Source: PubMed Central journal article supplement (PMC5103182; doi:10.1038/srep36000), 2016-11-10

## **Supplementary material for**

### **Novel pH sensing semiconductor for point-of-care detection of HIV-1 viremia**

Gurrala, R<sup>1</sup>, Lang, Z<sup>2</sup>, Shepherd, L<sup>2</sup>, Davidson, D<sup>2</sup>, Harrison, E<sup>2</sup>, McClure, M<sup>1</sup>, Kaye, S<sup>1</sup>, Toumazou, C<sup>2,3</sup>, Cooke, GS<sup>1</sup>

1 Division of Infectious Diseases, Imperial College, London

2 DNA Electronics Ltd, Wood Lane, London

3 Department of Bioengineering, Imperial College, London

## Supplementary data

**Supplementary table 1-** Primer sequences used in pH-LAMP reactions generating a primary amplicon of 317bp

| Primer designation | Sequence                                                                                                  | Location <sup>1</sup> |
|--------------------|-----------------------------------------------------------------------------------------------------------|-----------------------|
| F3                 | 5'- CCC TAC AAT CCC CAA AG – 3'                                                                           | 4199-4215             |
| F2                 | 5'- ATG GCA GTA TTC ATY CAC AAT TTT AA– 3'                                                                | 4307-4332             |
| FLP                | 5'- CCA ATC CCC CCT TTT– 3'                                                                               | 4336-4350             |
| F1C                | 5'- TAT YCT I <sup>2</sup> TC CCC TGC ACT GTA CCC C– 3'                                                   | 4351-4370             |
| R1C                | 5'- CGG GTT TAT TAC A– 3'                                                                                 | 4445-4457             |
| RLP                | 5'- GAC AGC AGA GAI CC– 3'                                                                                | 4460-4473             |
| R2                 | 5'- AGY TTT GCT GGT CCT TTC CAA– 3'                                                                       | 4477-4497             |
| R3                 | 5'- CCT TCA CCT TTC CA– 3'                                                                                | 4502-4515             |
| FIP                | 5'-TAT YCT 6TC CCC TGC ACT GTA CCC <u>CTT TT</u> <sup>3</sup> A<br>TGG CAG TAT TCA TYC ACA ATT TTA A – 3' |                       |
| RIP                | 5'-CGG GTT TAT TAC <u>ATT TTA</u> GYT TTG CTG GTC<br>CTT TCC AA– 3'                                       |                       |

<sup>1</sup> Location in GenBank K03455    <sup>2</sup> inosine    <sup>3</sup> thymidine spacer

**Supplementary table 2-** Clade distribution of clinical samples used for validation

| Clade   | Samples analysed in “tube assay” | Samples analysed in “chip assay” |
|---------|----------------------------------|----------------------------------|
| A       | 52 (5.2%)                        | 14 (8.5%)                        |
| AE      | 18 (1.8%)                        | 5 (3%)                           |
| AG      | 58 (5.8%)                        | 16 (9.7%)                        |
| B       | 581 (58.6%)                      | 19 (11.5%)                       |
| C       | 135 (13.6%)                      | 83 (50.6%)                       |
| D       | 34 (3.4%)                        | 8 (4.8%)                         |
| F       | 6 (0.6%)                         | 0                                |
| G       | 21 (2.1%)                        | 4 (2.4%)                         |
| H       | 2 (0.2%)                         | 0                                |
| J       | 4 (0.4%)                         | 0                                |
| K       | 1 (0.1%)                         | 0                                |
| mixed   | 79 (7.9%)                        | 10 (6%)                          |
| Unknown | 0                                | 5 (3%)                           |
| Total   | 991                              | 164                              |

**Supplementary table 3-** Comparison of clade distribution of samples included in the assays with failed pH RT-lamp tube assay reactions **(a)** and on-chip assay reactions **(b)** performed on clinical samples. Only the samples with viral load > 1000 copies per ml of plasma are represented above.

**a**

| Clade | Proportion of total | Proportion of failures |
|-------|---------------------|------------------------|
| A     | 5.2%                | 0%                     |
| AG    | 5.8%                | 14.3%                  |
| B     | 58.6%               | 58.9%                  |
| C     | 13.6%               | 12.5%                  |
| D     | 3.4%                | 5.3%                   |
| Other | 13.6%               | 8.9%                   |

**b**

| Clade | Proportion of total | Proportion of failures |
|-------|---------------------|------------------------|
| A     | 6.25%               | 0%                     |
| AG    | 10.4%               | 10%                    |
| AE    | 2.0%                | 50%                    |
| B     | 9.3%                | 0%                     |
| C     | 57.2%               | 8.1%                   |
| D     | 6.25%               | 33.33%                 |
| G     | 2.0%                | 100%                   |
| Other | 6.25%               | 16.6%                  |

**Supplementary figure 1a-d-** Optimisation of pH RT-LAMP reaction conditions for dNTP (a) Betaine (b), MgSO<sub>4</sub> (c) and KCl (d). 1000 copies of RNA standard was used as template for the reactions. The concentration that produced lowest time to detection in minutes was selected for the final protocol.

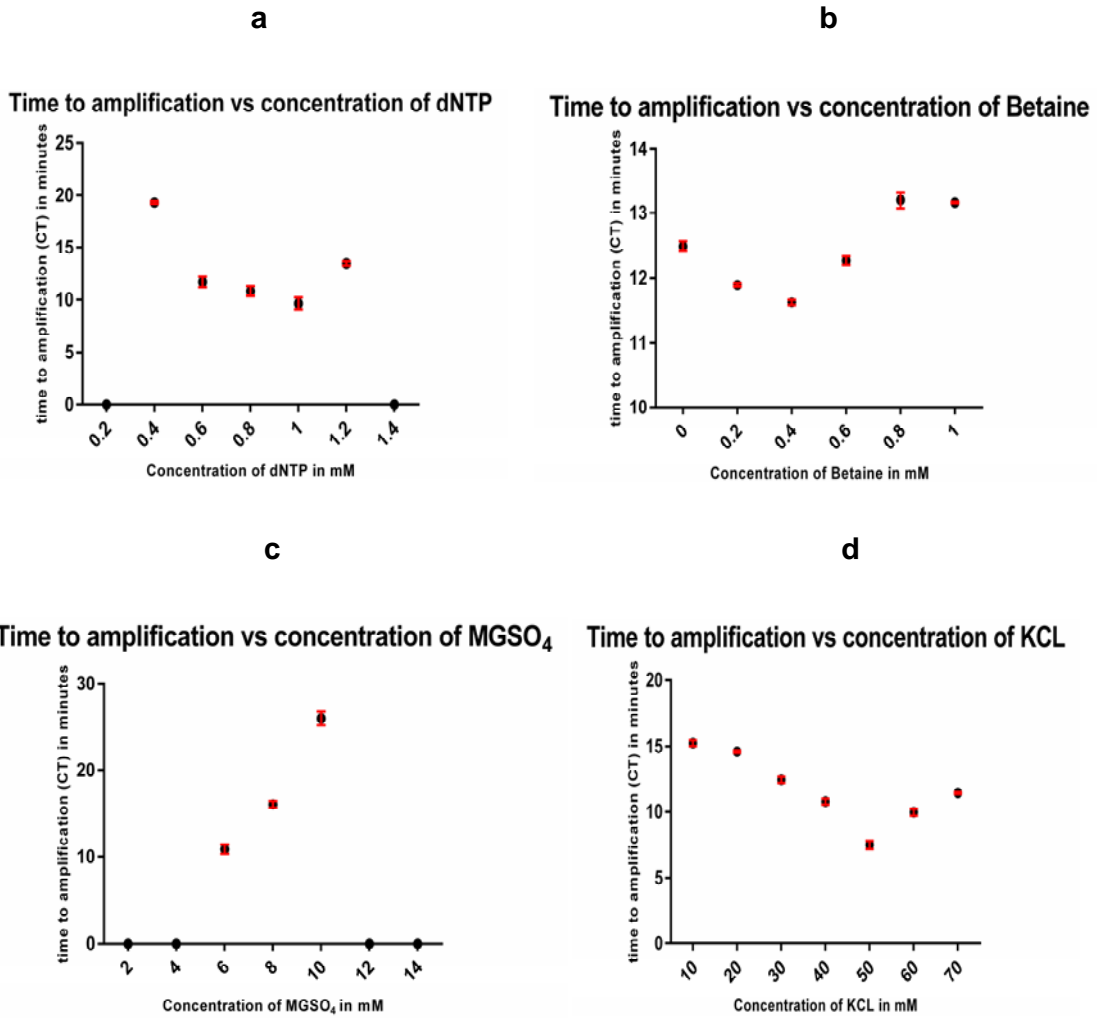

Supplement: srep36000-s1.pdf [file srep36000-s1.pdf]
